# Supplementary material
Source: publisher figshare collection journal article supplement (https://acs.figshare.com/ndownloader/files/5173609)

# Ionic Liquids as a Convenient New Medium for the Catalytic Asymmetric Dihydroxylation of Olefins Using a Recoverable and Reusable Osmium/Ligand

Luís C. Branco<sup>a</sup> and Carlos A. M. Afonso<sup>\*b</sup>

<sup>a</sup> *REQUIMTE/CQFB, Departamento de Química, Faculdade de Ciências e Tecnologia, Universidade Nova de Lisboa, 2829-516 Caparica, Portugal.*; <sup>b</sup> *CQFM, Department of Chemical Engineering, Instituto Superior Técnico, 1049-001 Lisboa, Portugal E-mail: carlosafonso@ist.utl.pt*

## Content

|                                                                                                                                                                                                                                                            | Page |
|------------------------------------------------------------------------------------------------------------------------------------------------------------------------------------------------------------------------------------------------------------|------|
| <b>Figure 1.</b> <sup>1</sup> H NMR spectra (in <i>d</i> <sub>6</sub> -DMSO) of initial [C <sub>4</sub> mim][PF <sub>6</sub> ]                                                                                                                             | S2   |
| <b>Figure 2.</b> <sup>13</sup> C NMR spectra (in <i>d</i> <sub>6</sub> -DMSO) of initial [C <sub>4</sub> mim][PF <sub>6</sub> ]                                                                                                                            | S3   |
| <b>Figure 3.</b> <sup>1</sup> H NMR spectra (in <i>d</i> <sub>6</sub> -DMSO) of [C <sub>4</sub> mim][PF <sub>6</sub> ] after run 13 in biphasic system (RTIL/ H <sub>2</sub> O), using K <sub>3</sub> Fe(CN) <sub>6</sub> as co-oxidant                    | S3t  |
| <b>Figure 4.</b> <sup>13</sup> C NMR spectra (in <i>d</i> <sub>6</sub> -DMSO) of [C <sub>4</sub> mim][PF <sub>6</sub> ] after run 13 in biphasic system (RTIL/ H <sub>2</sub> O), using K <sub>3</sub> Fe(CN) <sub>6</sub> as co-oxidant                   | S4   |
| <b>Figure 5.</b> <sup>1</sup> H NMR spectra (in <i>d</i> <sub>6</sub> -DMSO) of [C <sub>4</sub> mim][PF <sub>6</sub> ] after run 13 in monophasic system (RTIL/H <sub>2</sub> O/ <i>t</i> -BuOH), using K <sub>3</sub> Fe(CN) <sub>6</sub> as co-oxidant   | S4   |
| <b>Figure 6.</b> <sup>13</sup> C NMR spectra (in <i>d</i> <sub>6</sub> -DMSO) of [C <sub>4</sub> mim][PF <sub>6</sub> ] after run 13 in monophasic system (RTIL/H <sub>2</sub> O/ <i>t</i> -BuOH), using K <sub>3</sub> Fe(CN) <sub>6</sub> as co-oxidant  | S5   |
| <b>Figure 7.</b> <sup>1</sup> H NMR spectra (in <i>d</i> <sub>6</sub> -DMSO) of initial [C <sub>8</sub> mim][PF <sub>6</sub> ]                                                                                                                             | S5   |
| <b>Figure 8.</b> <sup>13</sup> C NMR spectra (in <i>d</i> <sub>6</sub> -DMSO) of initial [C <sub>8</sub> mim][PF <sub>6</sub> ]                                                                                                                            | S6   |
| <b>Figure 9.</b> <sup>1</sup> H NMR spectra (in <i>d</i> <sub>6</sub> -DMSO) of [C <sub>8</sub> mim][PF <sub>6</sub> ] after run 13 in biphasic system (RTIL/ H <sub>2</sub> O), using K <sub>3</sub> Fe(CN) <sub>6</sub> as co-oxidant                    | S6   |
| <b>Figure 10.</b> <sup>13</sup> C NMR spectra (in <i>d</i> <sub>6</sub> -DMSO) of [C <sub>8</sub> mim][PF <sub>6</sub> ] after run 13 in biphasic system (RTIL/ H <sub>2</sub> O), using K <sub>3</sub> Fe(CN) <sub>6</sub> as co-oxidant                  | S7   |
| <b>Figure 11.</b> <sup>1</sup> H NMR spectra (in <i>d</i> <sub>6</sub> -DMSO) of [C <sub>8</sub> mim][PF <sub>6</sub> ] after run 13 in monophasic system (RTIL/H <sub>2</sub> O/ <i>t</i> -BuOH), using K <sub>3</sub> Fe(CN) <sub>6</sub> as co-oxidant  | S7   |
| <b>Figure 12.</b> <sup>13</sup> C NMR spectra (in <i>d</i> <sub>6</sub> -DMSO) of [C <sub>8</sub> mim][PF <sub>6</sub> ] after run 13 in monophasic system (RTIL/H <sub>2</sub> O/ <i>t</i> -BuOH), using K <sub>3</sub> Fe(CN) <sub>6</sub> as co-oxidant | S8   |
| <b>Figure 13.</b> <sup>1</sup> H NMR spectra (in <i>d</i> <sub>6</sub> -DMSO) of [C <sub>4</sub> mim][PF <sub>6</sub> ] after run 13 in biphasic system (RTIL/ H <sub>2</sub> O), using NMO as co-oxidant                                                  | S8   |
| <b>Figure 14.</b> <sup>13</sup> C NMR spectra (in <i>d</i> <sub>6</sub> -DMSO) of [C <sub>4</sub> mim][PF <sub>6</sub> ] after run 13 in biphasic system (RTIL/ H <sub>2</sub> O), NMO as co-oxidant                                                       | S9   |
| <b>Figure 15.</b> <sup>1</sup> H NMR spectra (in <i>d</i> <sub>6</sub> -DMSO) of [C <sub>4</sub> mim][PF <sub>6</sub> ] after run 13 in monophasic system (RTIL/H <sub>2</sub> O/ <i>t</i> -BuOH), using NMO as co-oxidant                                 | S9   |
| <b>Figure 16.</b> <sup>13</sup> C NMR spectra (in <i>d</i> <sub>6</sub> -DMSO) of [C <sub>4</sub> mim][PF <sub>6</sub> ] after run 13 in monophasic system (RTIL/H <sub>2</sub> O/ <i>t</i> -BuOH), using NMO as co-oxidant                                | S10  |

**General:** The following chemicals were purchased from commercial sources and used as supplied: styrene, -methylstyrene, 1-hexene, 1-methylcyclohexene, *trans*-stilbene, *trans*-5-decene, K<sub>2</sub>CO<sub>3</sub>, K<sub>2</sub>OsO<sub>2</sub>(OH)<sub>4</sub>, K<sub>3</sub>[Fe(CN)<sub>6</sub>], *N*-methyl-morpholine oxide (NMO), (DHQD)<sub>2</sub>PHAL, (DHQD)<sub>2</sub>PYR and *t*-butanol. All aqueous solutions were prepared using distilled water. The room temperature ionic liquids (RTIL) based on the methylimidazolium cation [mim]<sup>1</sup>, and on the tetra-alkyl-dimethylguanidinium cation [(be)<sub>2</sub>dmg]<sup>2</sup> were prepared following reported procedures. <sup>1</sup>H, and <sup>13</sup>C NMR spectra were recorded on a Bruker AMX 400 spectrometer. Chemical shifts are reported downfield in parts per million (ppm) from a tetramethylsilane reference for <sup>1</sup>H and <sup>13</sup>C NMR. IR spectra were recorded on a FTIR instrument as thinly dispersed films.

Gas liquid chromatography (GLC) was carried out using He as carrier gas and chiral capillary column Supelco  $\alpha$ -dex 120 (30m x 0.25 mm). HPLC analyses were performed using Chiralpak AD column at 25 °C. Flash chromatography was carried out using an MN-Kiesel-gel 60M gel (230-400 mesh ASTM, Art. 815381). All eluents were distilled prior to use. Preparative and analytical thin layer chromatography (TLC) was carried out using, respectively, MN Kieselgel G/UV254 (Art. 816320) glass-backed plates and MN Alugram, SIL G/UV<sub>254</sub> (Art. 818133). The plates were visualised using ultraviolet light (254 nm) or using phosphomolybdic acid.

## References

- [1] a) T. Kitazume, F. Zulfiqar, G. Tanaka, *Green Chemistry*, **2000**, 2, 133; b) A. E Visser, R. P. Swatloski, R. D. Rogers, *Green Chemistry*, **2000**, 2, 1. c) L. C. Branco, J. N. Rosa, J. J. M. Ramos, C. A. M. Afonso, *Chem. Eur. J.* **2002**, 8, 3671.  
 [2] N. M. M. Mateus, L. C. Branco, N. M. T. Lourenço, C. A. M. Afonso, *Green Chem.* **2003**, 5, 347.

## Comparison of Spectral Data (<sup>1</sup>H and <sup>13</sup>C NMR) of the Ionic Liquid Between the Initial and Final Recycled Samples

**Figure 1.** <sup>1</sup>H NMR spectra (in *d*<sub>6</sub>-DMSO) of initial [C<sub>4</sub>mim][PF<sub>6</sub>]

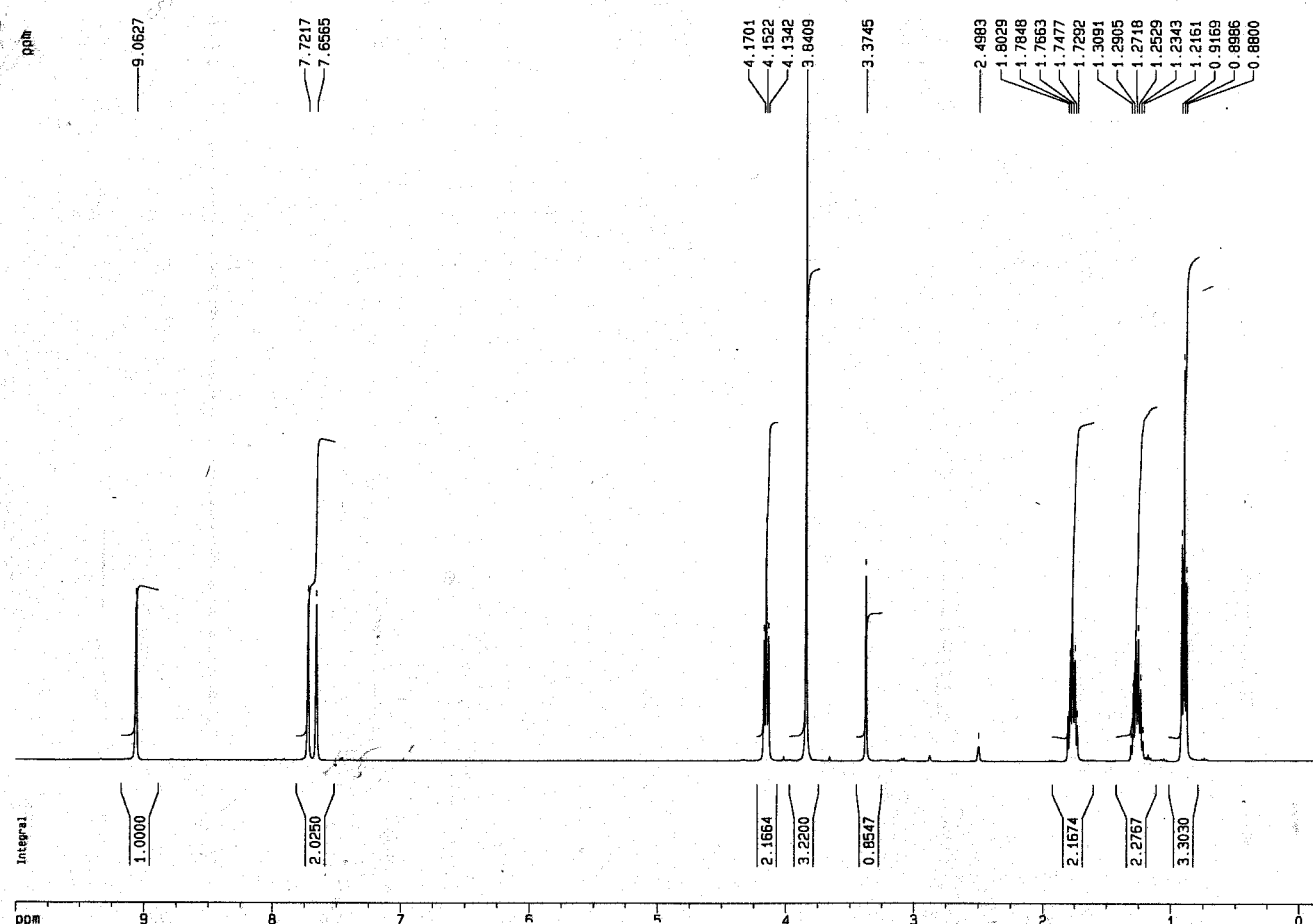

**Figure 2.**  $^{13}\text{C}$  NMR spectra (in  $d_6$ -DMSO) of initial  $[\text{C}_4\text{mim}][\text{PF}_6]$

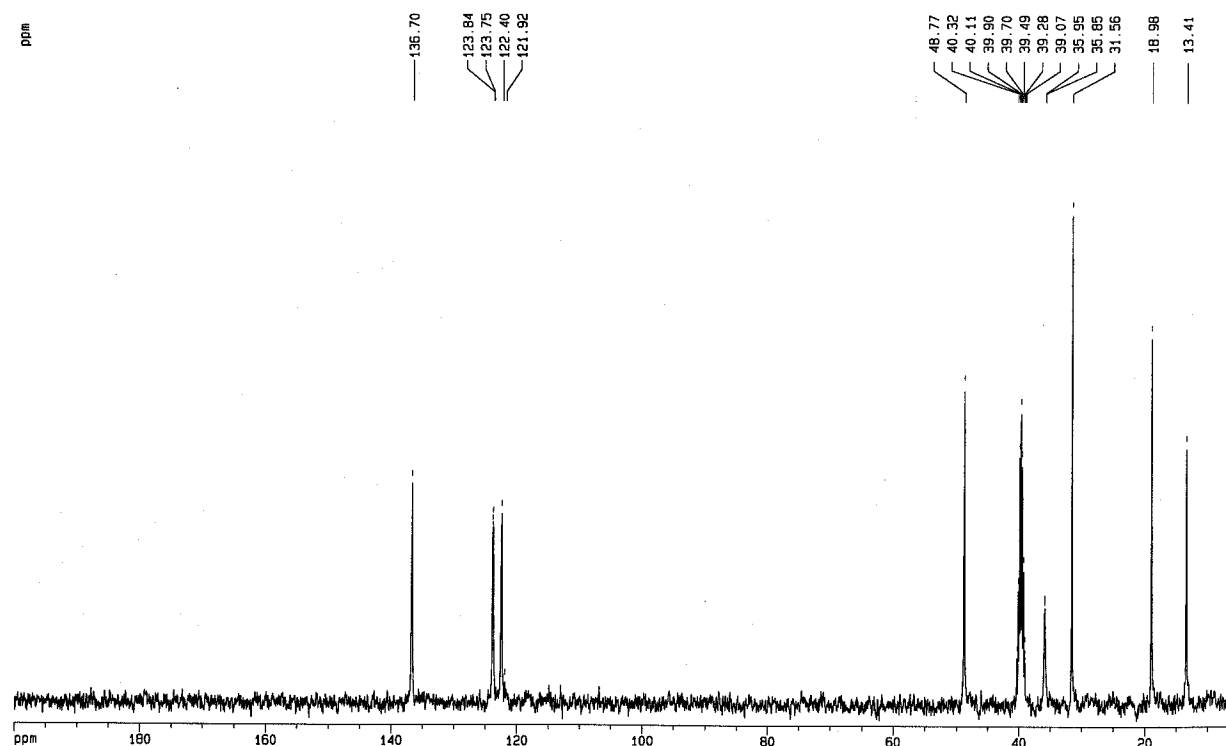

**Figure 3.**  $^1\text{H}$  NMR spectra (in  $d_6$ -DMSO) of  $[\text{C}_4\text{mim}][\text{PF}_6]$  after run 13 in biphasic system (RTIL/ $\text{H}_2\text{O}$ ), using  $\text{K}_3\text{Fe}(\text{CN})_6$  as co-oxidant

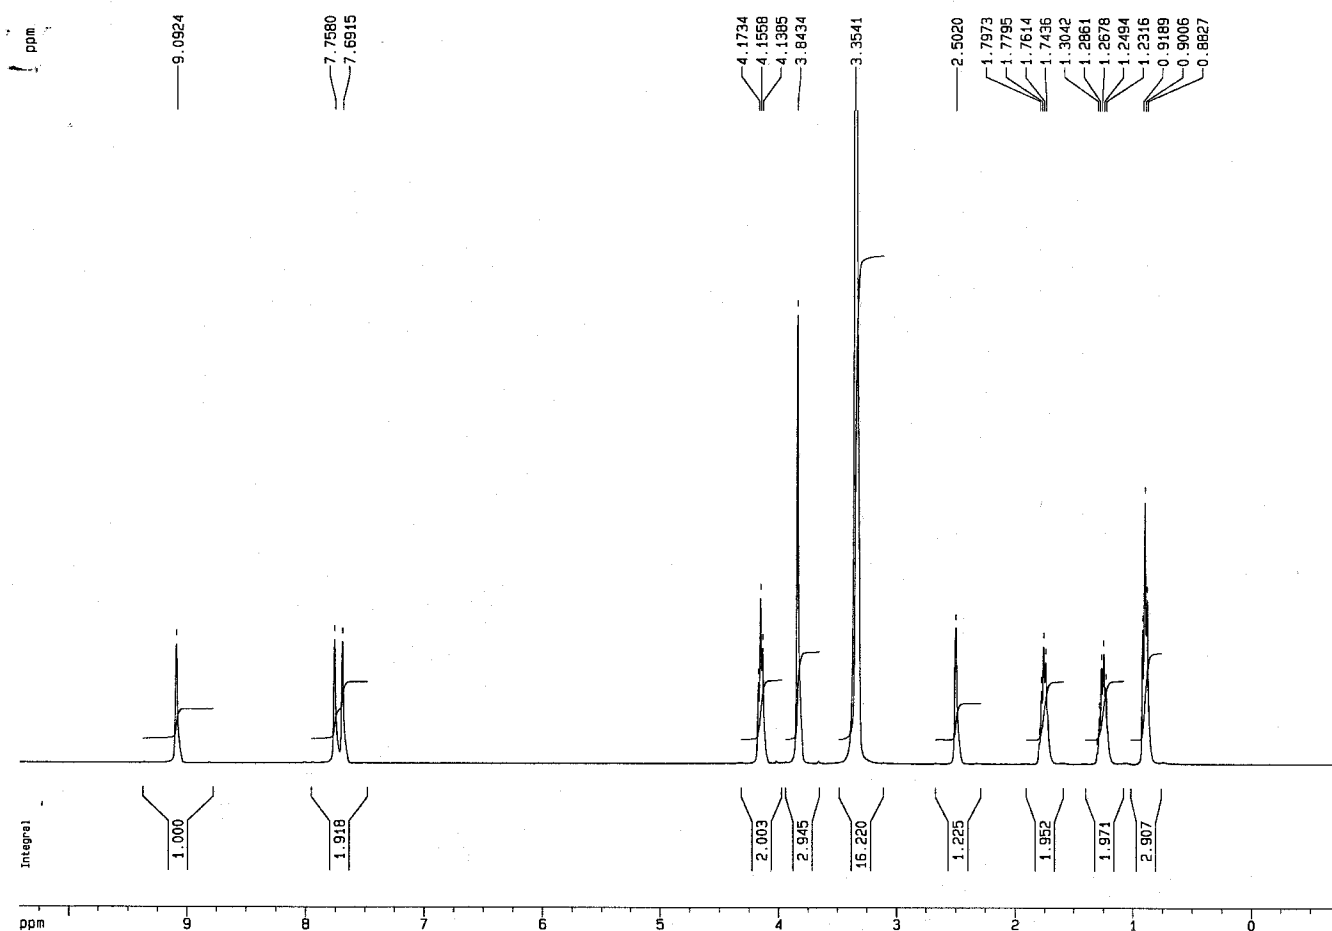

**Figure 4.**  $^{13}\text{C}$  NMR spectra (in  $d_6$ -DMSO) of  $[\text{C}_4\text{mim}][\text{PF}_6]$  after run 13 in biphasic system (RTIL/  $\text{H}_2\text{O}$ ), using  $\text{K}_3\text{Fe}(\text{CN})_6$  as co-oxidant

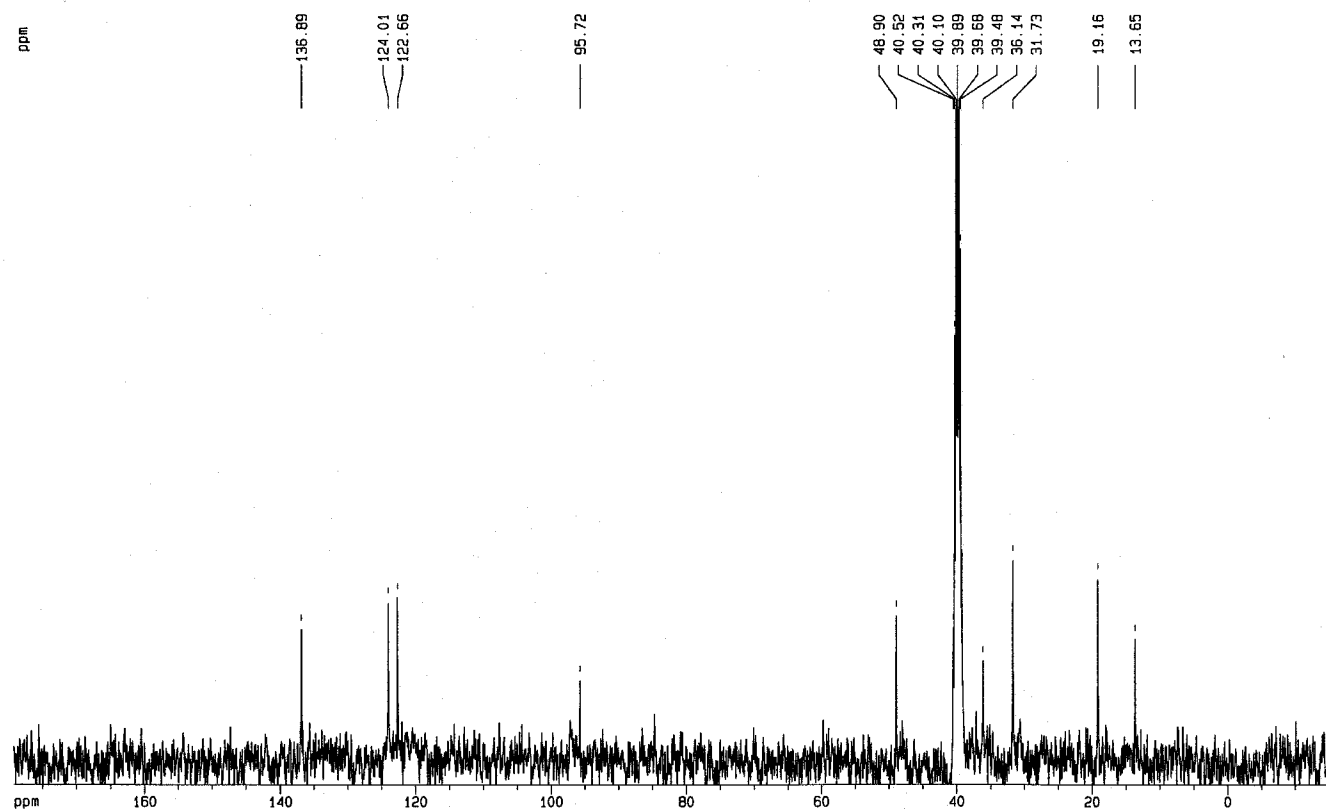

**Figure 5.**  $^1\text{H}$  NMR spectra (in  $d_6$ -DMSO) of  $[\text{C}_4\text{mim}][\text{PF}_6]$  after run 13 in monophasic system (RTIL/  $\text{H}_2\text{O}$ /t-BuOH), using  $\text{K}_3\text{Fe}(\text{CN})_6$  as co-oxidant

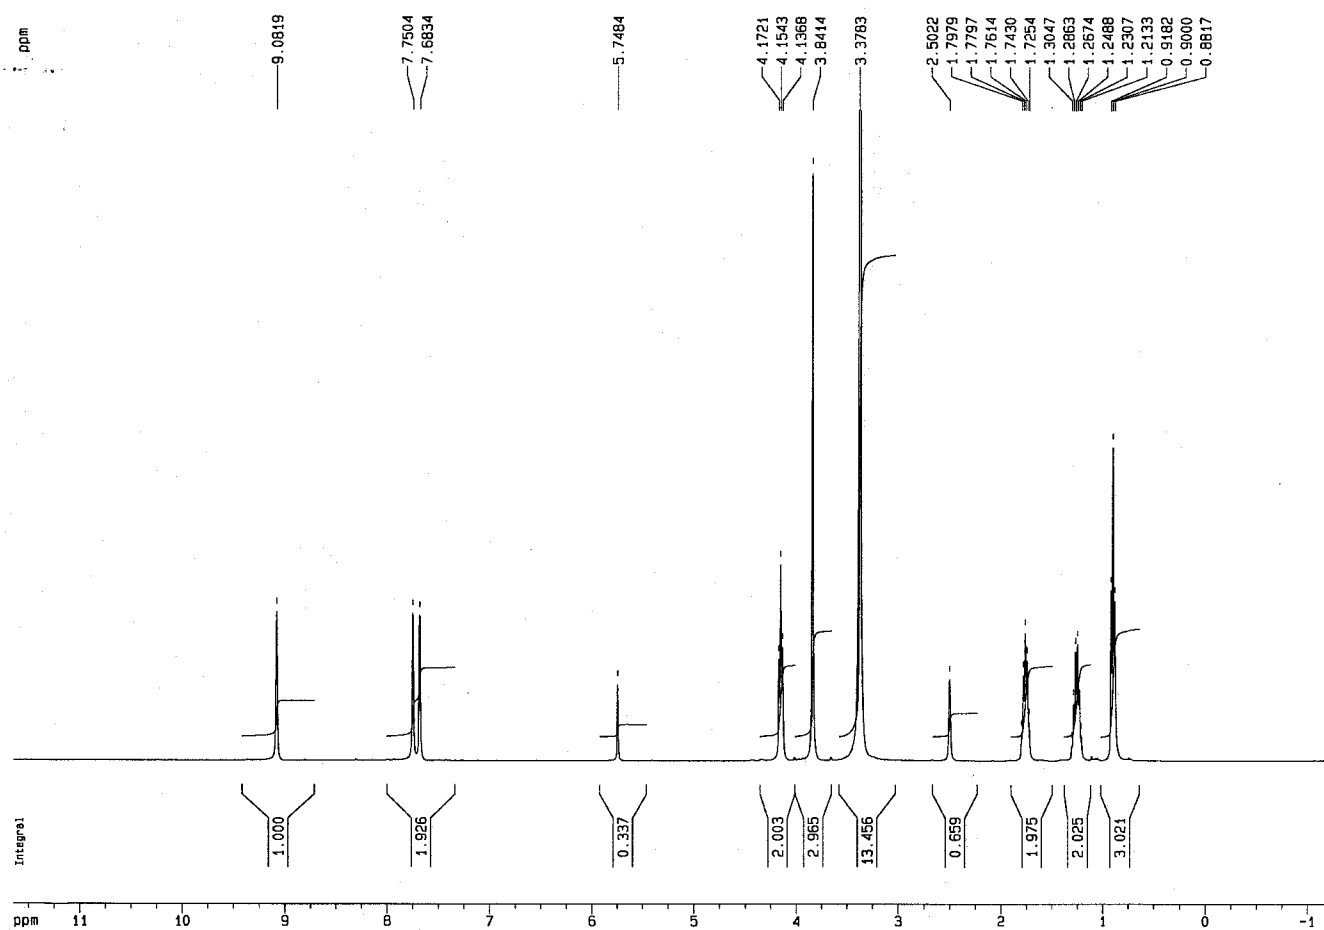

**Figure 6.**  $^{13}\text{C}$  NMR spectra (in  $d_6$ -DMSO) of  $[\text{C}_4\text{mim}][\text{PF}_6]$  after run 13 in monophasic system (RTIL/ $\text{H}_2\text{O}$ / $t$ -BuOH), using  $\text{K}_3\text{Fe}(\text{CN})_6$  as co-oxidant

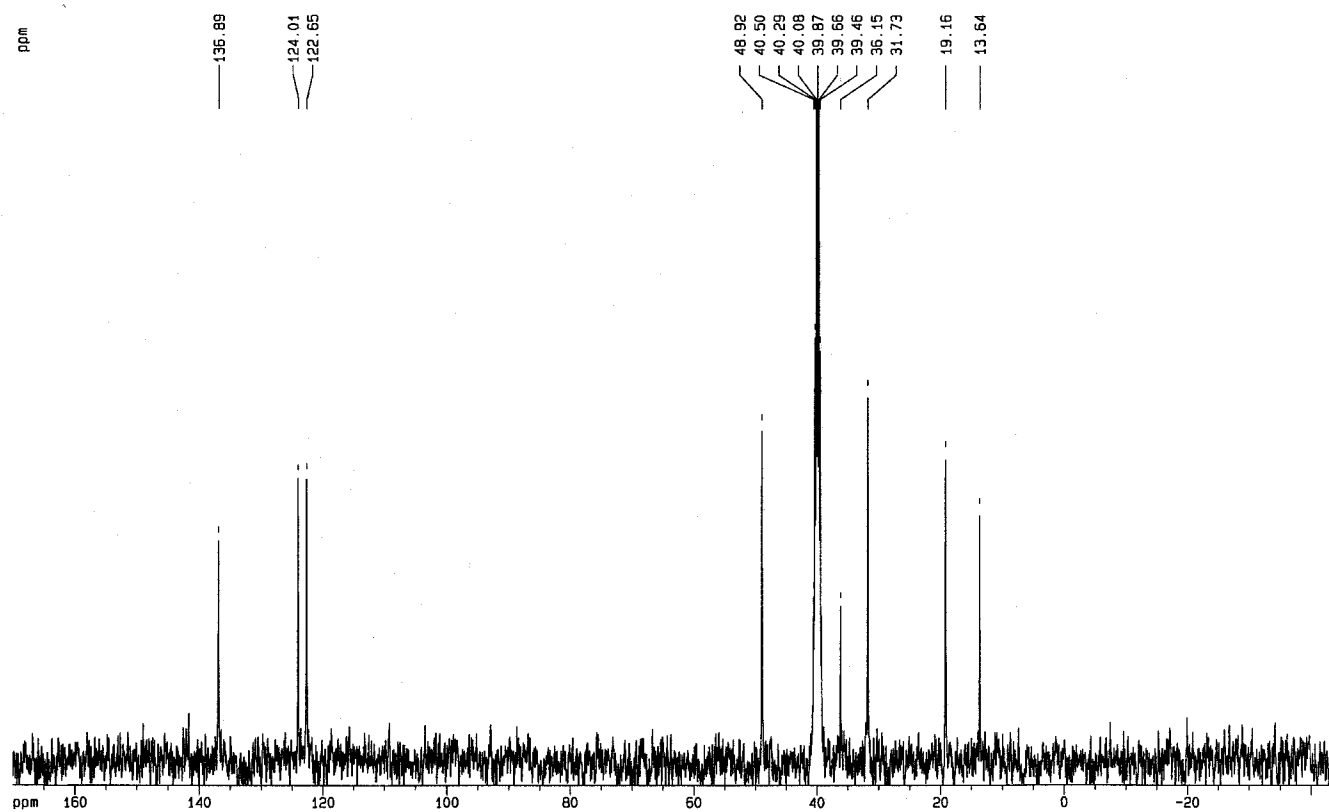

**Figure 7.**  $^1\text{H}$  NMR spectra (in  $d_6$ -DMSO) of initial  $[\text{C}_8\text{mim}][\text{PF}_6]$

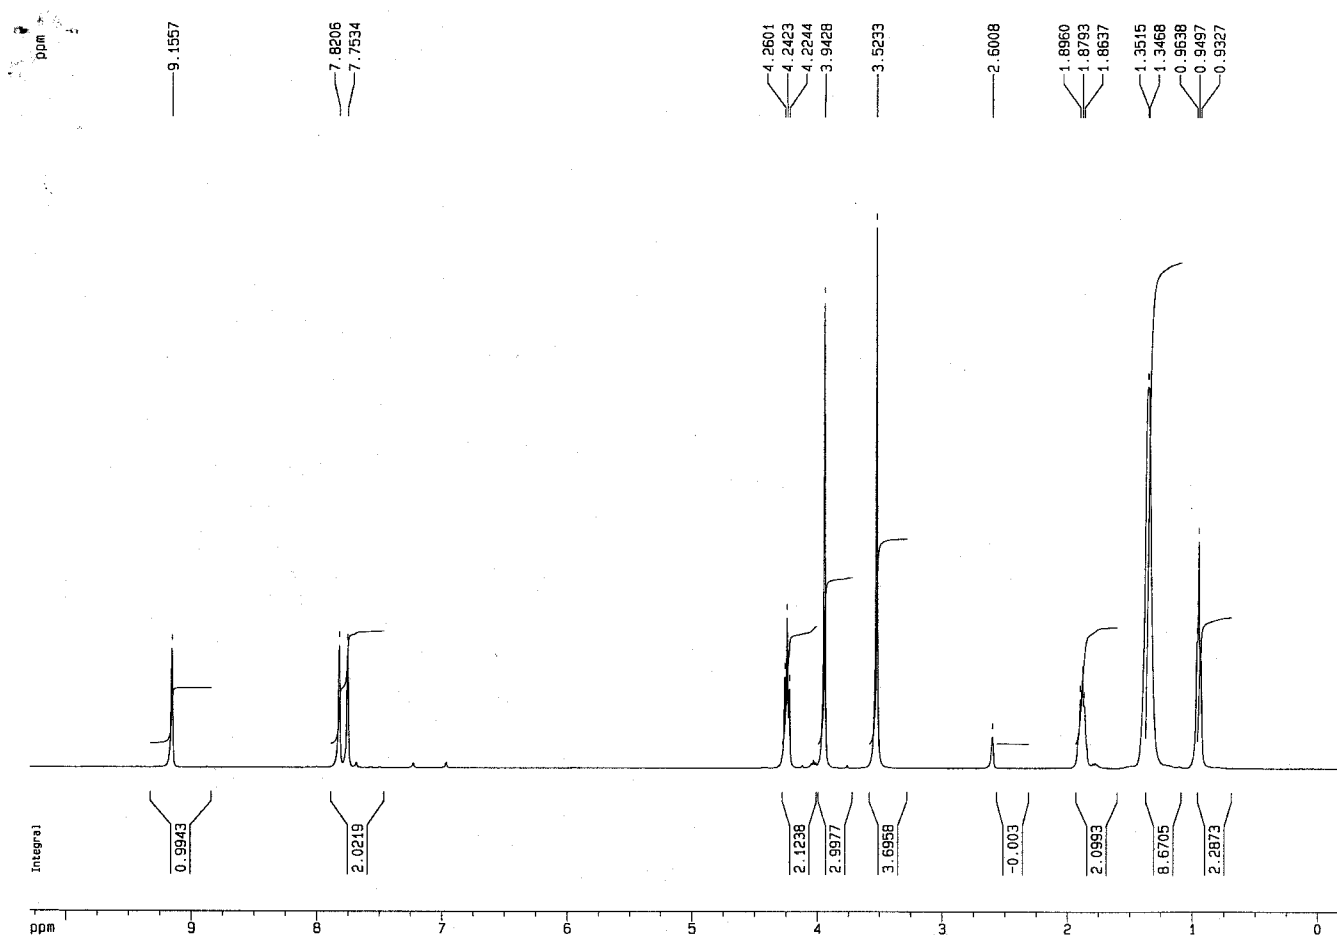

**Figure 8.**  $^{13}\text{C}$  NMR spectra (in  $d_6$ -DMSO) of initial  $[\text{C}_8\text{mim}][\text{PF}_6]$

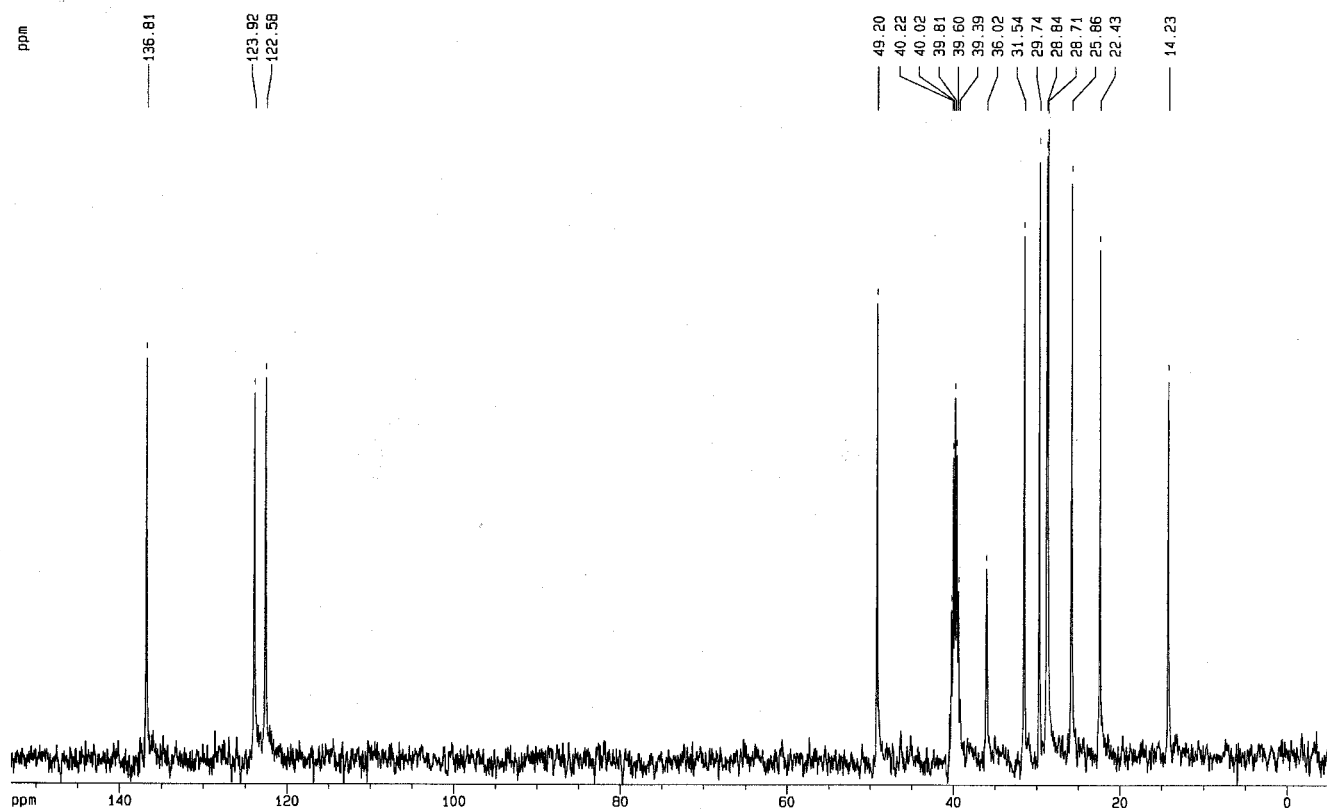

**Figure 9.**  $^1\text{H}$  NMR spectra (in  $d_6$ -DMSO) of  $[\text{C}_8\text{mim}][\text{PF}_6]$  after run 13 in biphasic system (RTIL/ $\text{H}_2\text{O}$ ), using  $\text{K}_3\text{Fe}(\text{CN})_6$  as co-oxidant

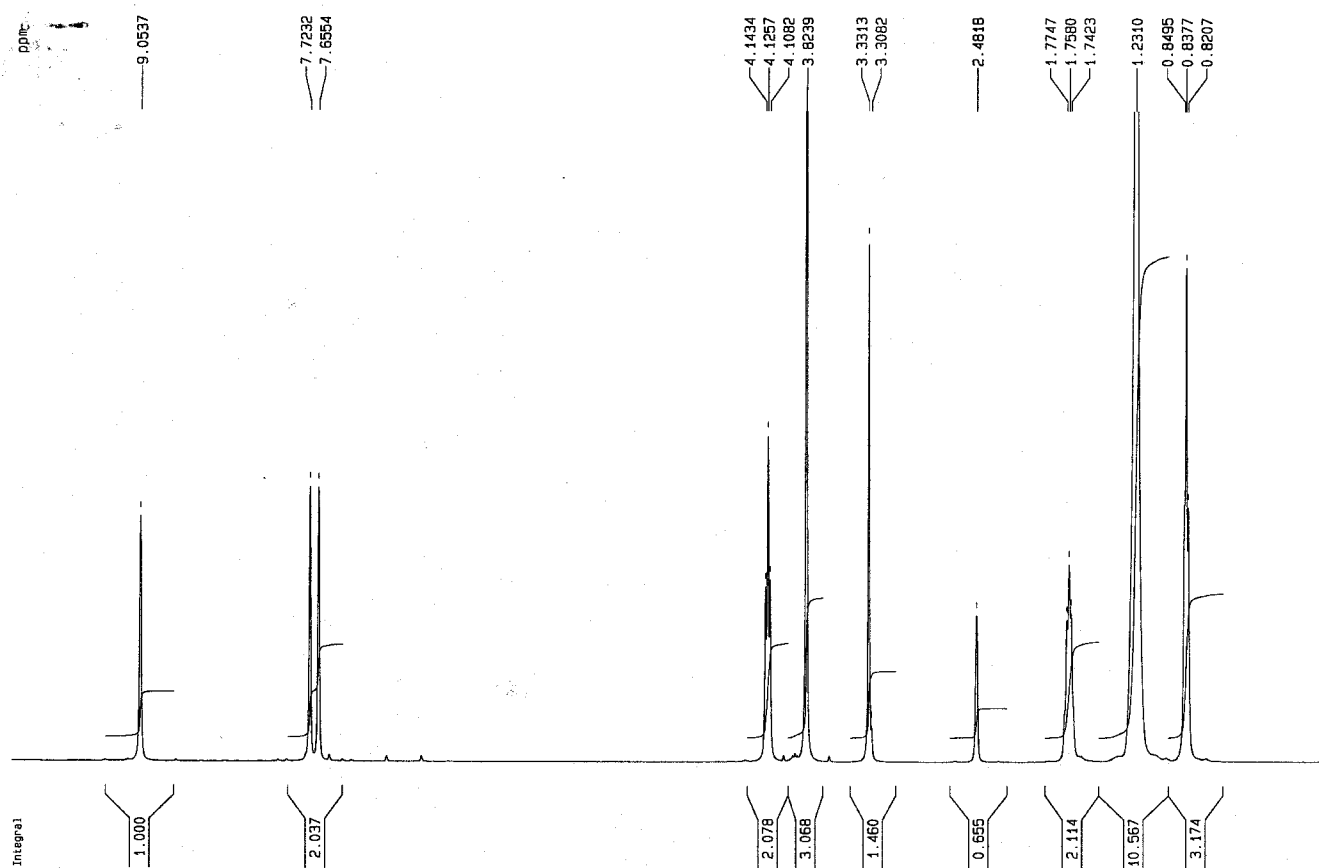

**Figure 10.**  $^{13}\text{C}$  NMR spectra (in  $d_6$ -DMSO) of  $[\text{C}_8\text{mim}][\text{PF}_6]$  after run 13 in biphasic system (RTIL/  $\text{H}_2\text{O}$ ), using  $\text{K}_3\text{Fe}(\text{CN})_6$  as co-oxidant

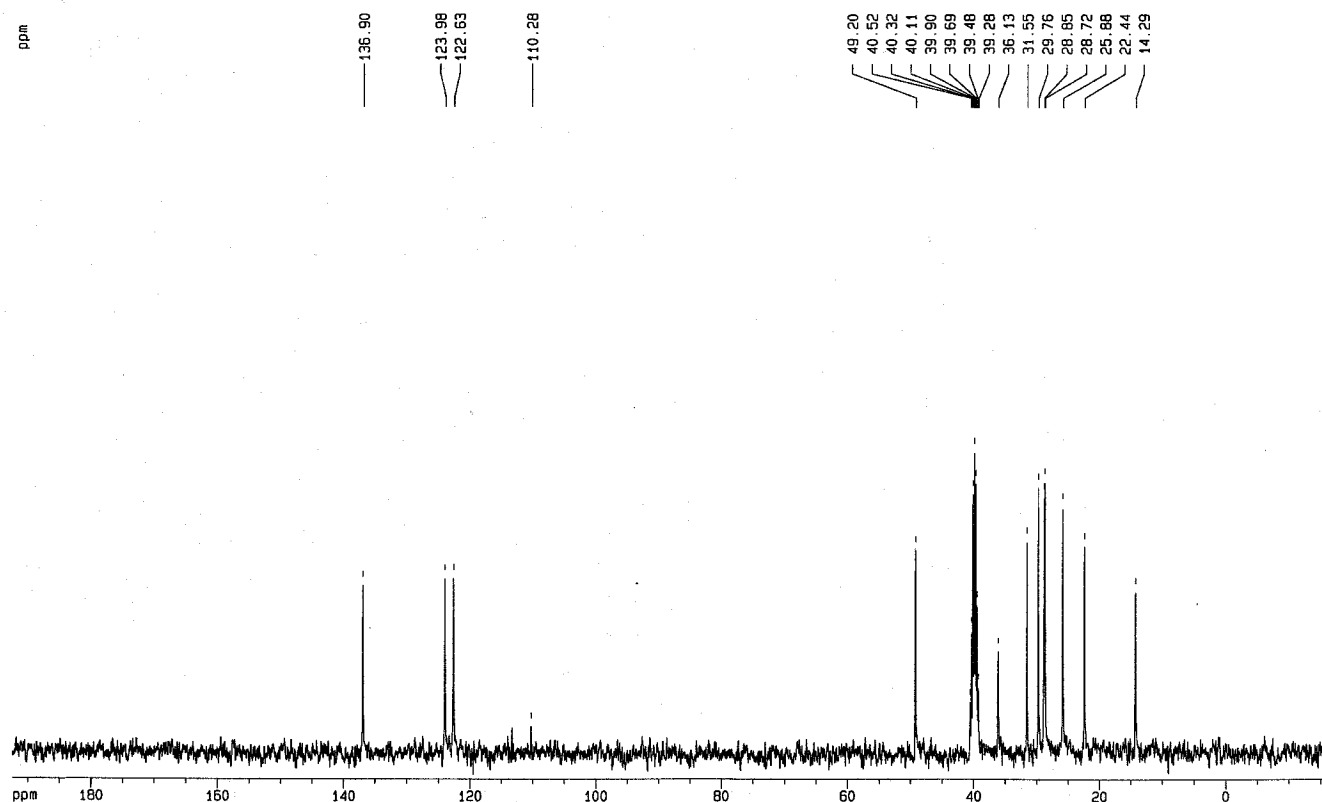

**Figure 11.**  $^1\text{H}$  NMR spectra (in  $d_6$ -DMSO) of  $[\text{C}_8\text{mim}][\text{PF}_6]$  after run 13 in monophasic system (RTIL/ $\text{H}_2\text{O}$ /t-BuOH), using  $\text{K}_3\text{Fe}(\text{CN})_6$  as co-oxidant

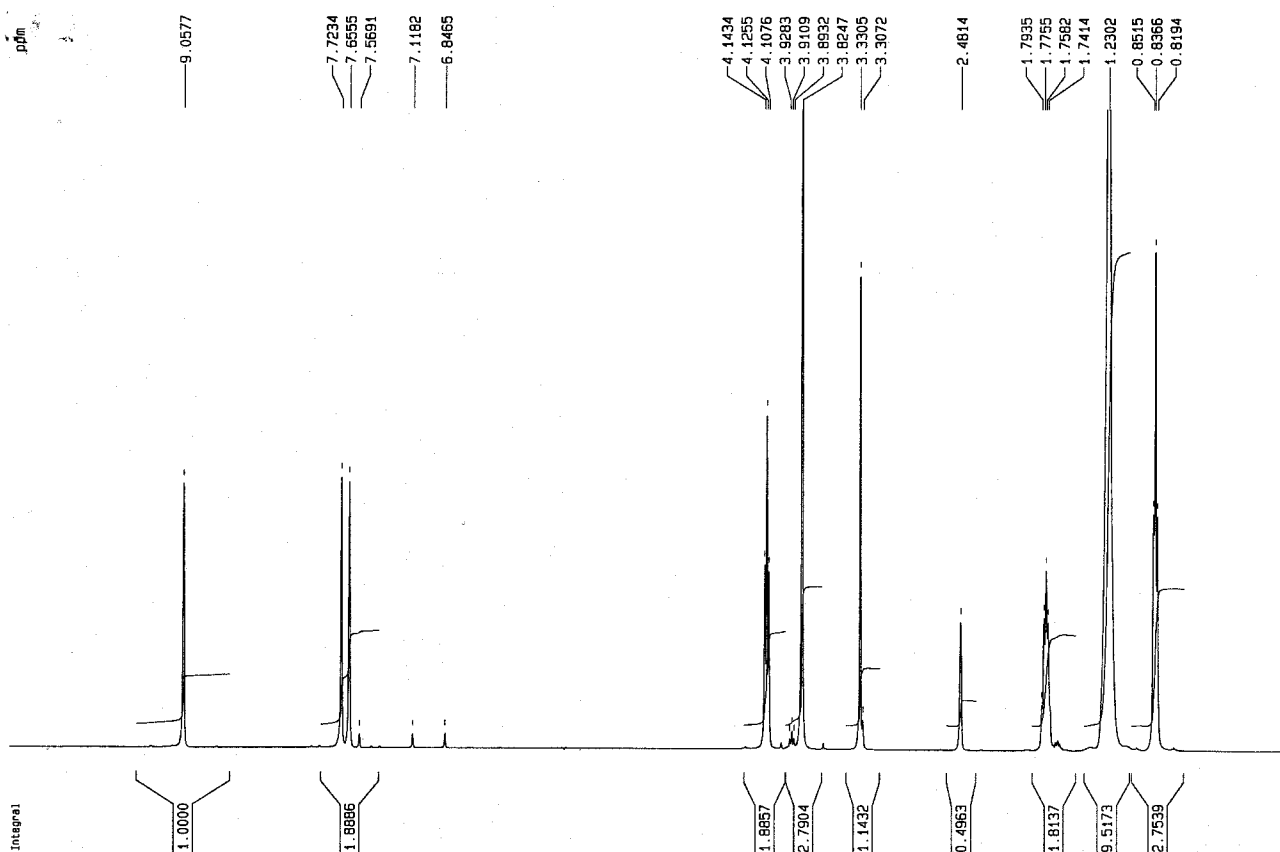

**Figure 12.**  $^{13}\text{C}$  NMR spectra (in  $d_6$ -DMSO) of  $[\text{C}_8\text{mim}][\text{PF}_6]$  after run 13 in monophasic system (RTIL/ $\text{H}_2\text{O}$ /t-BuOH), using  $\text{K}_3\text{Fe}(\text{CN})_6$  as co-oxidant

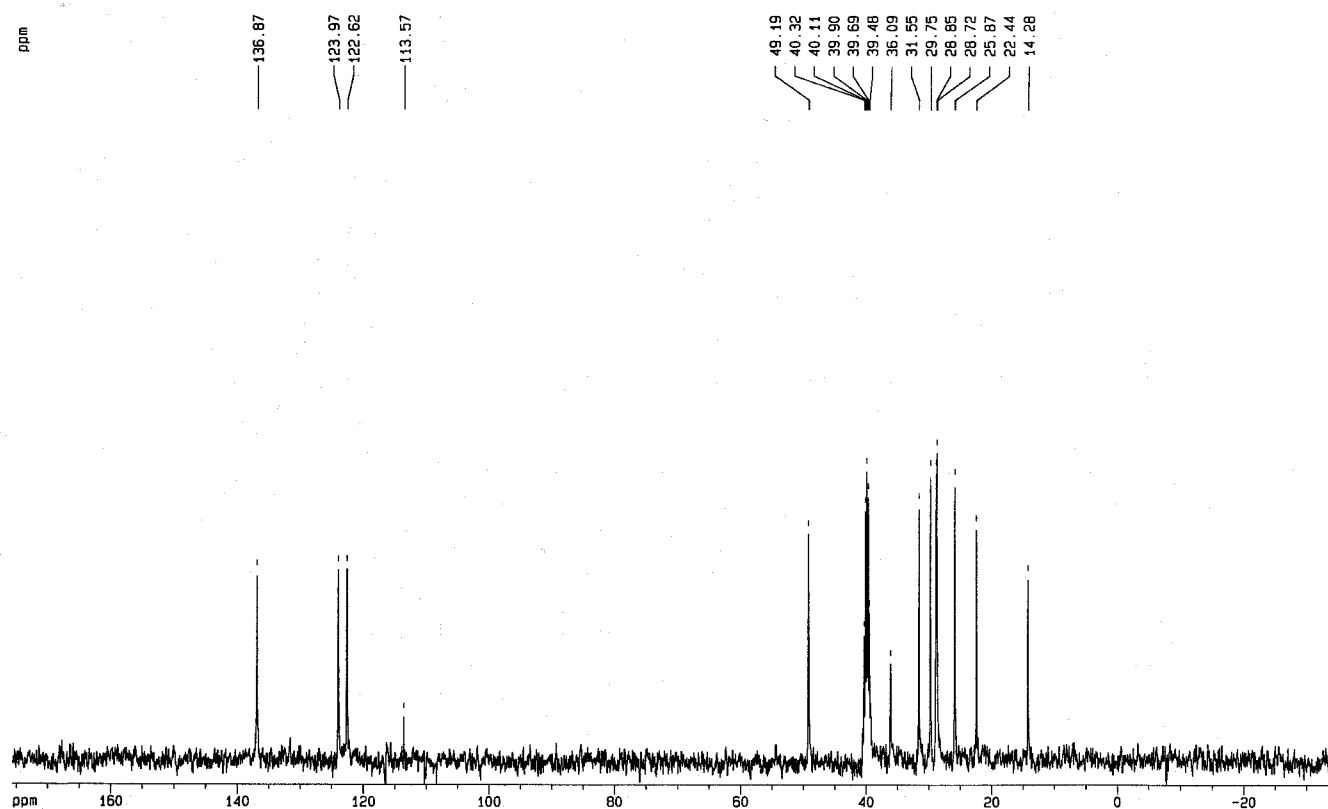

**Figure 13.**  $^1\text{H}$  NMR spectra (in  $d_6$ -DMSO) of  $[\text{C}_4\text{mim}][\text{PF}_6]$  after run 13 in biphasic system (RTIL/ $\text{H}_2\text{O}$ ), using NMO as co-oxidant

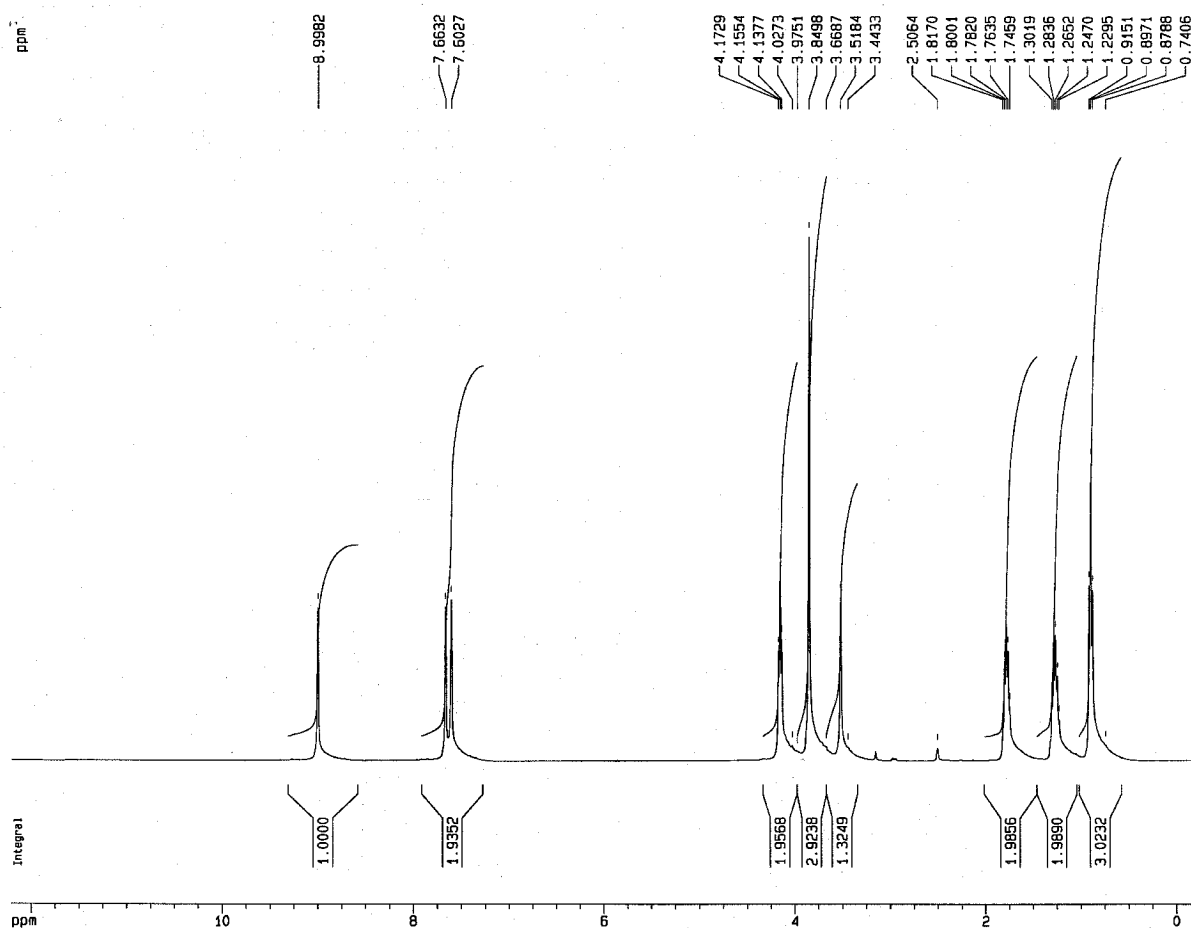



**Figure 14.**  $^{13}\text{C}$  NMR spectra (in  $d_6$ -DMSO) of  $[\text{C}_4\text{mim}][\text{PF}_6]$  after run 13 in biphasic system (RTIL/  $\text{H}_2\text{O}$ ), NMO as co-oxidant

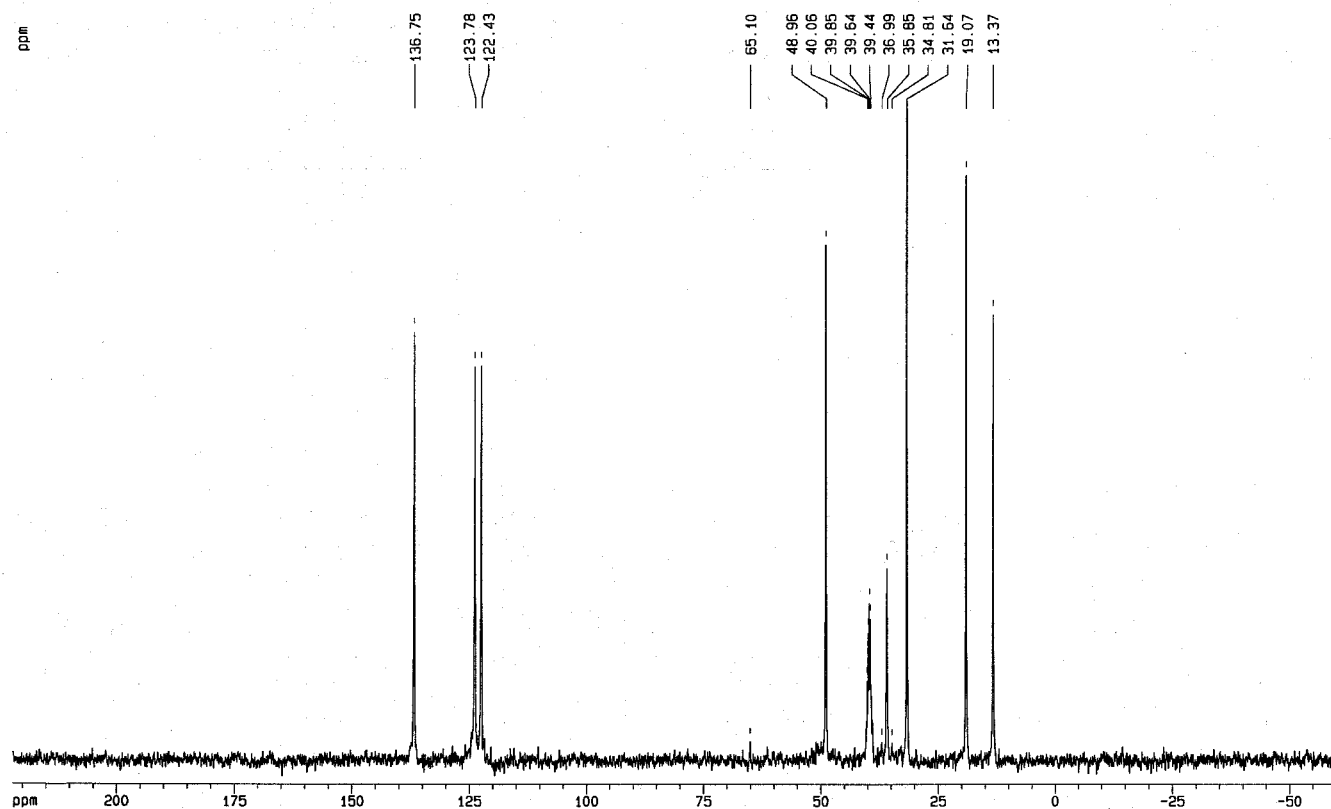

**Figure 15.**  $^1\text{H}$  NMR spectra (in  $d_6$ -DMSO) of  $[\text{C}_4\text{mim}][\text{PF}_6]$  after run 13 in monophasic system (RTIL/ $\text{H}_2\text{O}$ /t-BuOH), using NMO as co-oxidant

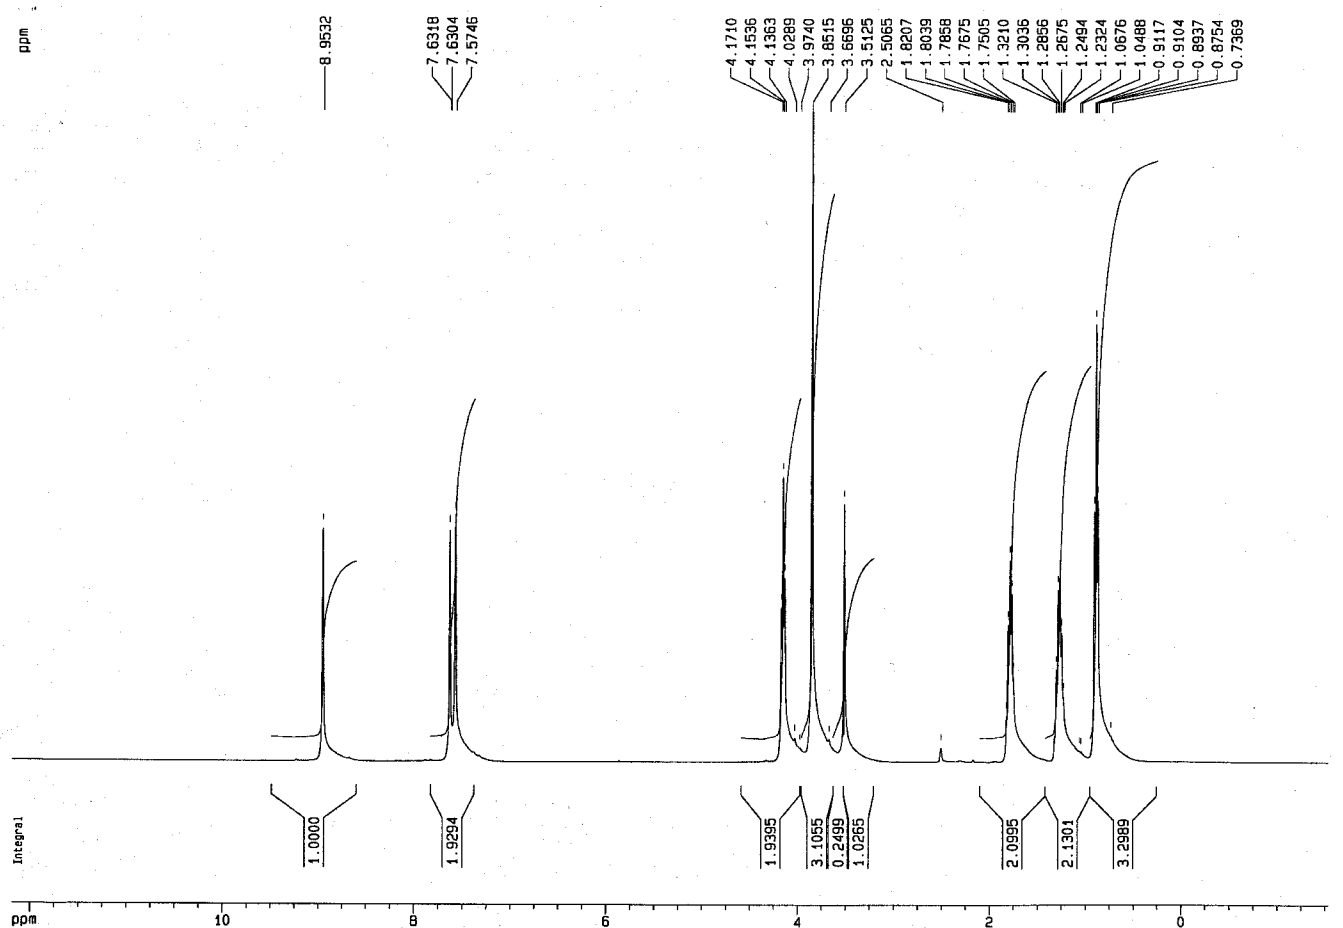

**Figure 16.**  $^{13}\text{C}$  NMR spectra (in  $d_6$ -DMSO) of  $[\text{C}_4\text{mim}][\text{PF}_6]$  after run 13 in monophasic system (RTIL/ $\text{H}_2\text{O}$ /t-BuOH), using NMO as co-oxidant

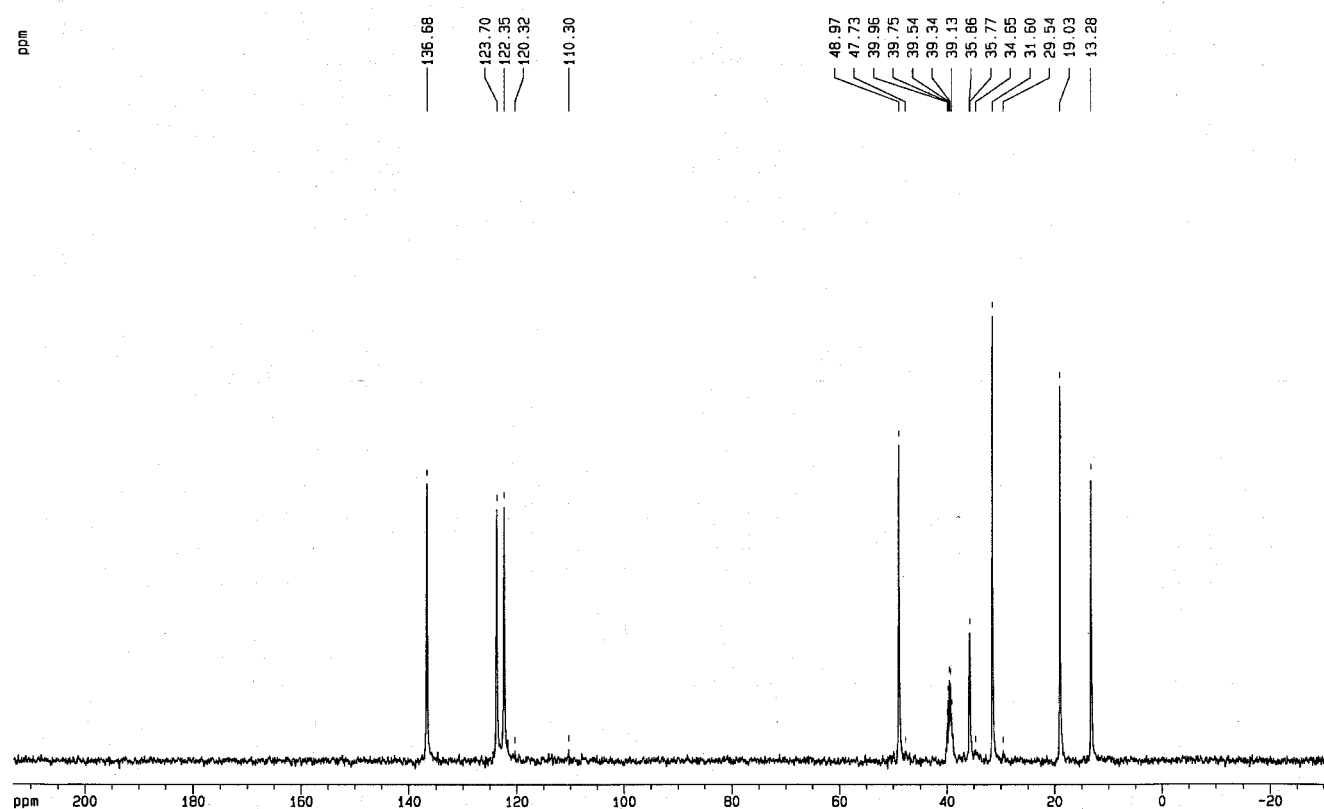

Supplement: Supplementary file 1 [file 5173609]
